# Supplementary material
Source: PubMed Central journal article supplement (PMC6660350)
Supplement: NIHMS1033636-supplement-Supp_figS1-5.pdf [file NIHMS1033636-supplement-Supp_figS1-5.pdf]

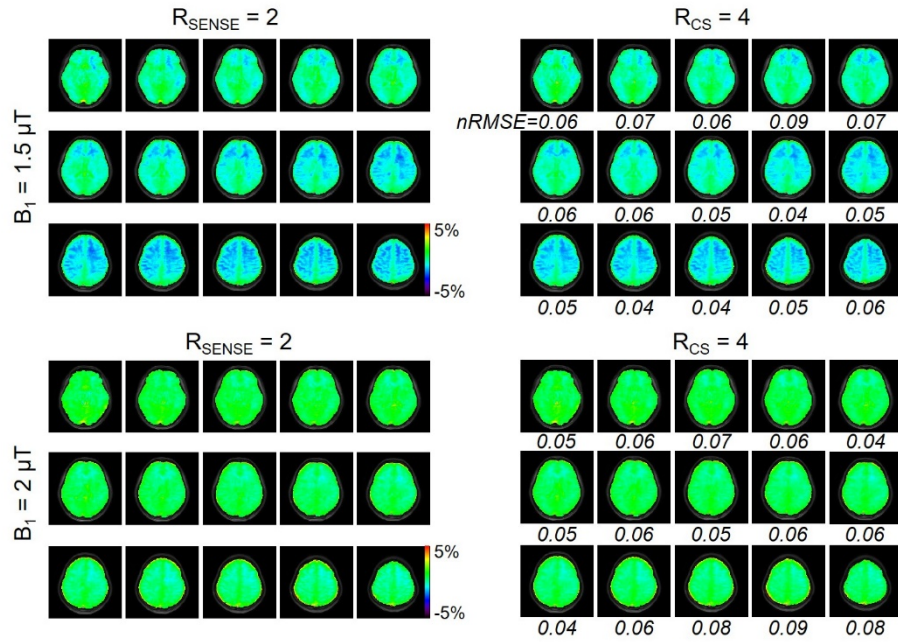

**Supporting Information Figure S1.** A comparison of 3D APTw images (15 slices) from a healthy volunteer reconstructed with SENSE and CS using prospective acceleration factors of 2 and 4, respectively.

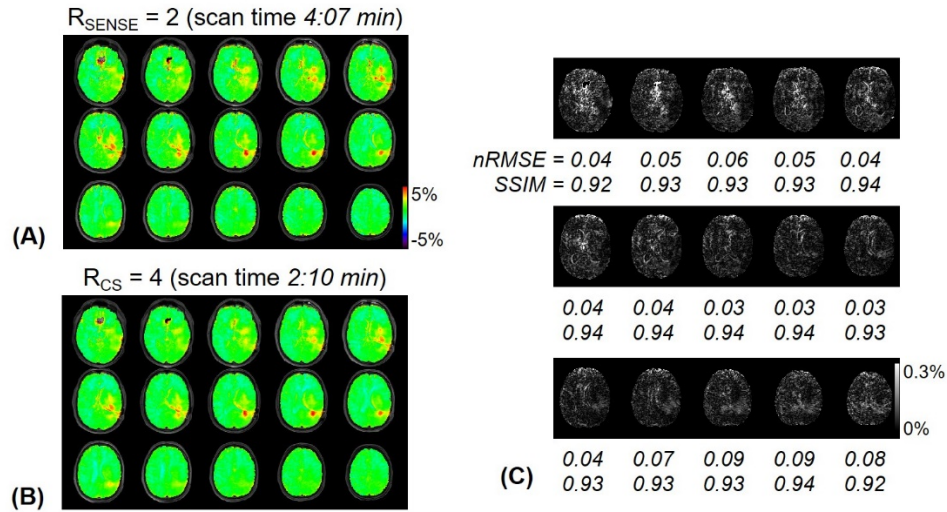

**Supporting Information Figure S2.** APTw images obtained for a patient with a glioblastoma using a RF saturation power of  $2 \mu\text{T}$  and saturation duration of 2 sec, reconstructed by (A) SENSE ( $R_{\text{SENSE}} = 2$ ) and (B) CS ( $R_{\text{CS}} = 4$ ). (C) The corresponding error images ( $= |\text{SENSE} - \text{CS}|$ ), nRMSE and SSIM values, from comparing the two reconstructions.

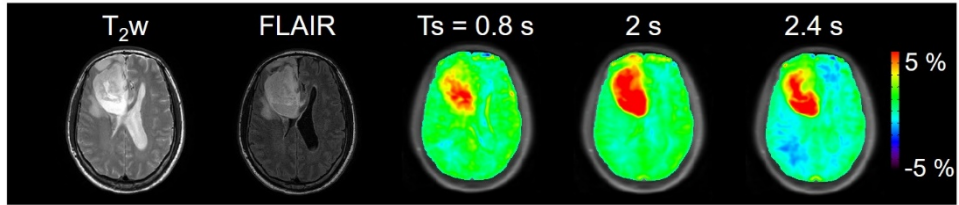

**Supporting Information Figure S3.** APTw images obtained for a patient with a glioblastoma using a RF saturation power of 2  $\mu$ T and saturation durations of 0.8, 2, and 2.4 sec at 100% RF duty-cycle.

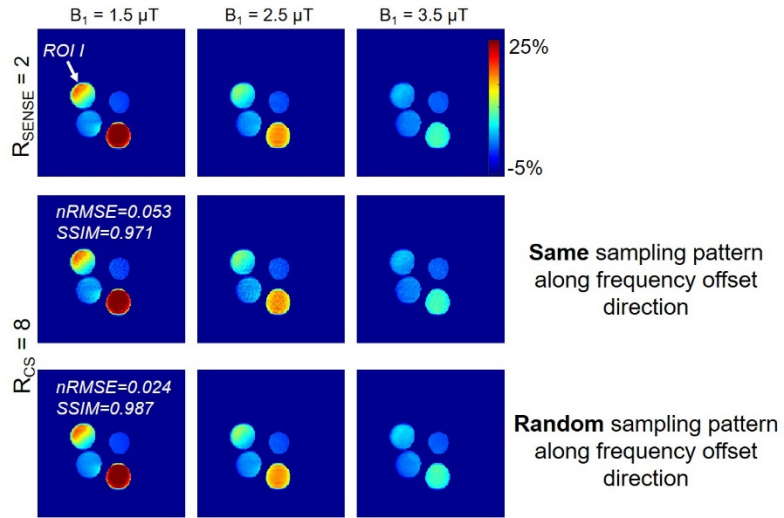

**Supporting Information Figure S4.**  $MTR_{\text{asym}}(2.5\text{ppm})$  maps reconstructed by SENSE with  $R_{\text{SENSE}} = 2$  (top row) and CS with  $R_{\text{CS}} = 8$  (middle row: identical sampling pattern applied along a frequency offset direction and bottom row: random sampling pattern applied along a frequency offset direction).

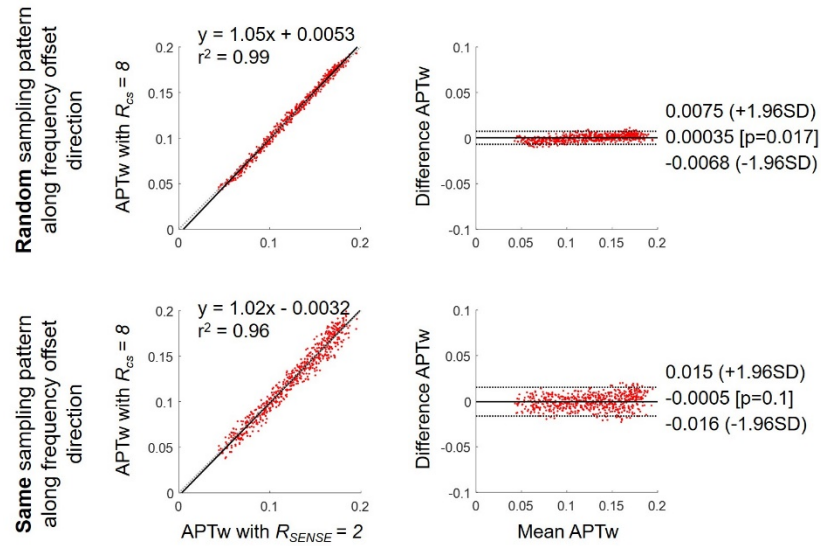

**Supporting Information Figure S5.** Correlation and Bland-Altman plots of the  $MTR_{asym}(2.5ppm)$  signal at RF saturation powers of  $1.5 \mu T$ , reconstructed from the reference standard (SENSE = 2) and CS factor 8 (top row: random sampling pattern applied along a frequency offset direction and bottom row: identical sampling pattern applied along a frequency offset direction). In the Bland-Altman plot, the mean bias is indicated by the solid black line and the 97% limits of agreement are indicated by dotted black lines.
